# Supplementary material for: A sinter-resistant catalytic system based on ultra-small Ni–Cu nanoparticles encapsulated in Ca–SiO2for high-performance ethanol steam reforming
Source: Royal Society of Chemistry journal article supplement (doi:10.1039/d0nr04938g), 2020-01-01
Supplement: d0nr04938g1.pdf [file d0nr04938g1.pdf]

## Supplement Information

### **A Sinter-resistant Catalytic System Based on Ultra-small Ni-Cu Nanoparticle Encapsulated in Ca-SiO<sub>2</sub> for High-performance Ethanol Steam Reforming**

Rong Dai<sup>a, ‡</sup>, Ziliang Zheng<sup>b, ‡</sup>, Chenshuai Lian<sup>a</sup>, Kai Shi<sup>a</sup>, Xu Wu<sup>a</sup>, Xia An<sup>a</sup>, Xianmei Xie<sup>a, \*</sup>

<sup>a</sup>*College of Chemistry and Chemical Engineering, Taiyuan University of Technology, Taiyuan, Shanxi 030024, China*

<sup>b</sup>*Translational Medicine Research Center, Shanxi Medical University, Taiyuan, Shanxi 030001, China*

---

\* Corresponding author. E-mail addresses: xxmsxy@sina.com (X.M. Xie).

‡ These authors contributed equally to this work.

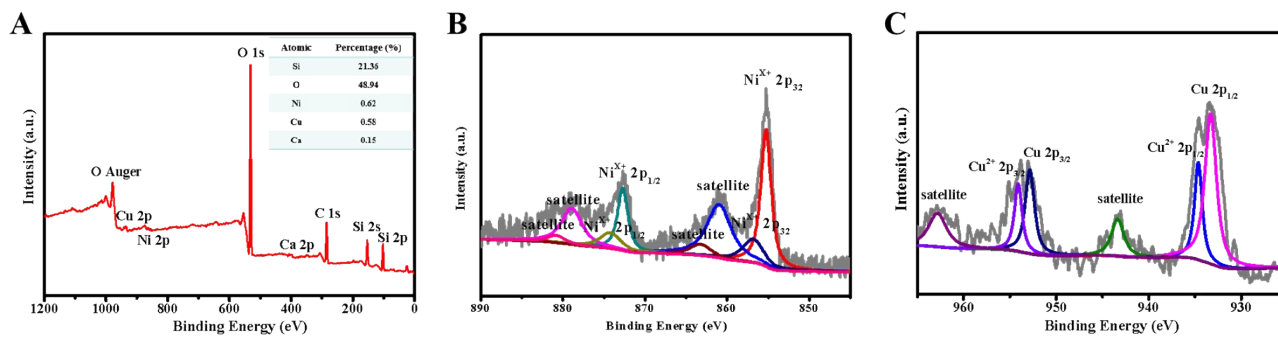

Figure S1 A) XPS survey spectrum B) Ni 2p XPS spectrum, C) Cu 2p XPS spectrum of reactive Ni-Cu@CS.

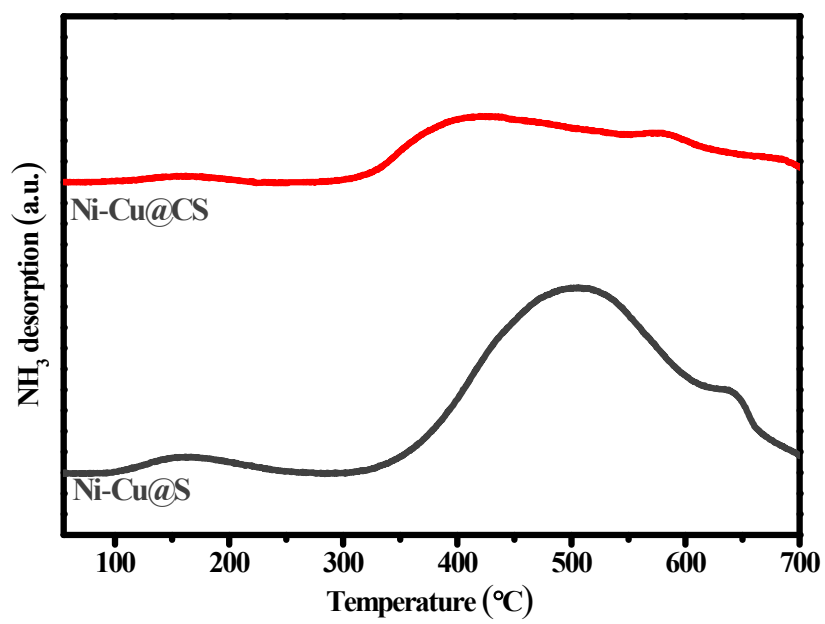

Figure S2 NH<sub>3</sub>-TPD profiles of Ni-Cu@CS and Ni-Cu@S samples.

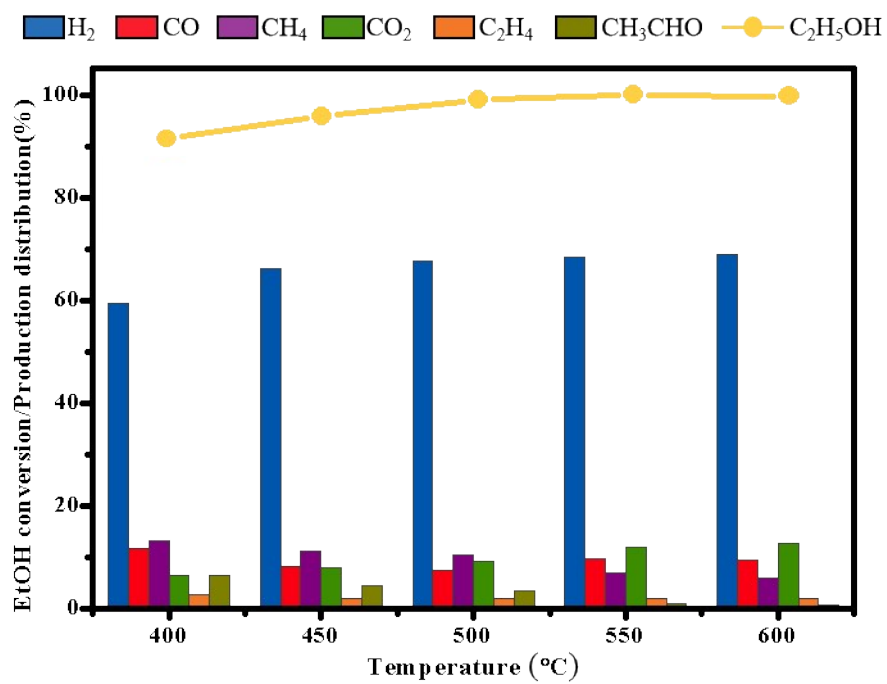

Figure S3 Variation of ethanol conversion and product selectivity as a function of reaction temperature over Ni-Cu@S.
